# Supplementary material
Source: ML conference proceedings conference paper supplement (https://proceedings.mlr.press/v108/gultchin20a.html)
Supplement: Supplementary file 1 [file gultchin20a-supp.pdf]

---

## Supplementary Material for: Differentiable Causal Backdoor Discovery

---

### A Proofs

**Lemma 1.** If  $W \perp\!\!\!\perp Y \mid Z^* \cup \{X\}$ , then there exists some scalar  $\phi_X(Z^*)$  such that  $W \perp\!\!\!\perp Y \mid \{\phi_X(Z^*), X\}$ .

**Proof.** We will discuss the case for binary  $Y$ , as the proof for linear-Gaussian models follows the same idea. Let the structural equation for  $Y$  be given by  $f_y(x, \pi_Z, \pi_U)$ , where  $\pi_Z$  and  $\pi_U$  are the observed and unobserved parents of  $Y$  in the corresponding causal graph. The conditional distribution of  $Y$  is given by

$$\begin{aligned} p(y \mid x, \mathbf{z}^*) &= \\ p(f_y(x, \pi_Z, \pi_U) = 1 \mid x, \mathbf{z}^*)^y &\times \\ (1 - p(f_y(x, \pi_Z, \pi_U) = 1 \mid x, \mathbf{z}^*))^{1-y}. & \end{aligned}$$

By assumption,  $f_y(\cdot)$  is functionally independent of  $W$ . Now we just have to show that the random variable  $f_y(x, \pi_Z, \pi_U)$  is conditionally independent of  $W$  given  $X$  and  $Z^*$ . Since  $W \perp\!\!\!\perp Y \mid Z^* \cup \{X\}$ , it cannot be the case that  $W$  and  $\pi_{Z^*, X}$ , the parents of  $Y$  not in  $Z^* \cup \{X\}$ , are conditionally dependent given  $Z^* \cup \{X\}$ . We define  $\phi_X(\mathbf{z}^*)$  as  $p(f_y(x, \pi_Z, \pi_U) = 1 \mid x, \mathbf{z}^*)$  for each possible realization of  $X$ . Given  $X$ , we can fully reconstruct from  $\phi_X(\mathbf{z}^*)$  a conditional distribution of  $Y$  that makes information about  $W$  irrelevant.  $\square$

**Theorem 1.** If  $W \not\perp\!\!\!\perp Y \mid Z^* \cup \{X\}$ , and

$$\begin{aligned} \sum_{\mathbf{z}^* \in \Phi_{x\mathbf{z}^*}^f} p(y \mid w, x, \mathbf{z}^*) \frac{p(\mathbf{z}^* \mid w, x)}{\Pr(Z^* \in \Phi_{x\mathbf{z}^*}^f \mid w, x)} &\neq \\ \sum_{\mathbf{z}^* \in \Phi_{x\mathbf{z}^*}^f} p(y \mid x, \mathbf{z}^*) \frac{p(\mathbf{z}^* \mid x)}{\Pr(Z^* \in \Phi_{x\mathbf{z}^*}^f \mid x)}, & \end{aligned} \quad (6)$$

for some value  $f$  in the range of  $\phi_x(\cdot)$ , then  $W \not\perp\!\!\!\perp Y \mid \{\phi_X(Z^*), X\}$ .

**Proof.** Assume, contrary to the hypothesis, that  $W \perp\!\!\!\perp Y \mid \{\phi_X(Z^*), X\}$ . Then

$$\begin{aligned} p(y \mid w, x, \phi_x(Z^*) = f) &= p(y \mid x, \phi_x(Z^*) = f) \Rightarrow \\ \sum_{\mathbf{z}^*} p(y \mid w, x, \phi_x(Z^*) = f, \mathbf{z}^*) p(\mathbf{z}^* \mid w, x, \phi_x(Z^*) = f) &= \\ \sum_{\mathbf{z}^*} p(y \mid x, \phi_x(Z^*) = f, \mathbf{z}^*) p(\mathbf{z}^* \mid x, \phi_x(Z^*) = f) &\Rightarrow \\ \sum_{\mathbf{z}^*} p(y \mid w, x, \mathbf{z}^*) p(\mathbf{z}^* \mid w, x, \phi_x(Z^*) = f) &= \\ \sum_{\mathbf{z}^*} p(y \mid x, \mathbf{z}^*) p(\mathbf{z}^* \mid x, \phi_x(Z^*) = f) &\Rightarrow \\ \sum_{\mathbf{z}^* \in \Phi_{x\mathbf{z}^*}^f} p(y \mid w, x, \mathbf{z}^*) \frac{p(\mathbf{z}^* \mid w, x)}{\Pr(Z^* \in \Phi_{x\mathbf{z}^*}^f \mid w, x)} &= \\ \sum_{\mathbf{z}^* \in \Phi_{x\mathbf{z}^*}^f} p(y \mid x, \mathbf{z}^*) \frac{p(\mathbf{z}^* \mid x)}{\Pr(Z^* \in \Phi_{x\mathbf{z}^*}^f \mid x)}, & \end{aligned}$$

which contradicts the hypothesis.  $\square$
